# Supplementary material for: The Thames: Arresting Ecosystem Decline and Building Back Better
Source: MDPI journal article supplement (doi:10.3390/su13116045), 2021-05-27
Supplement: s1 [file s1]

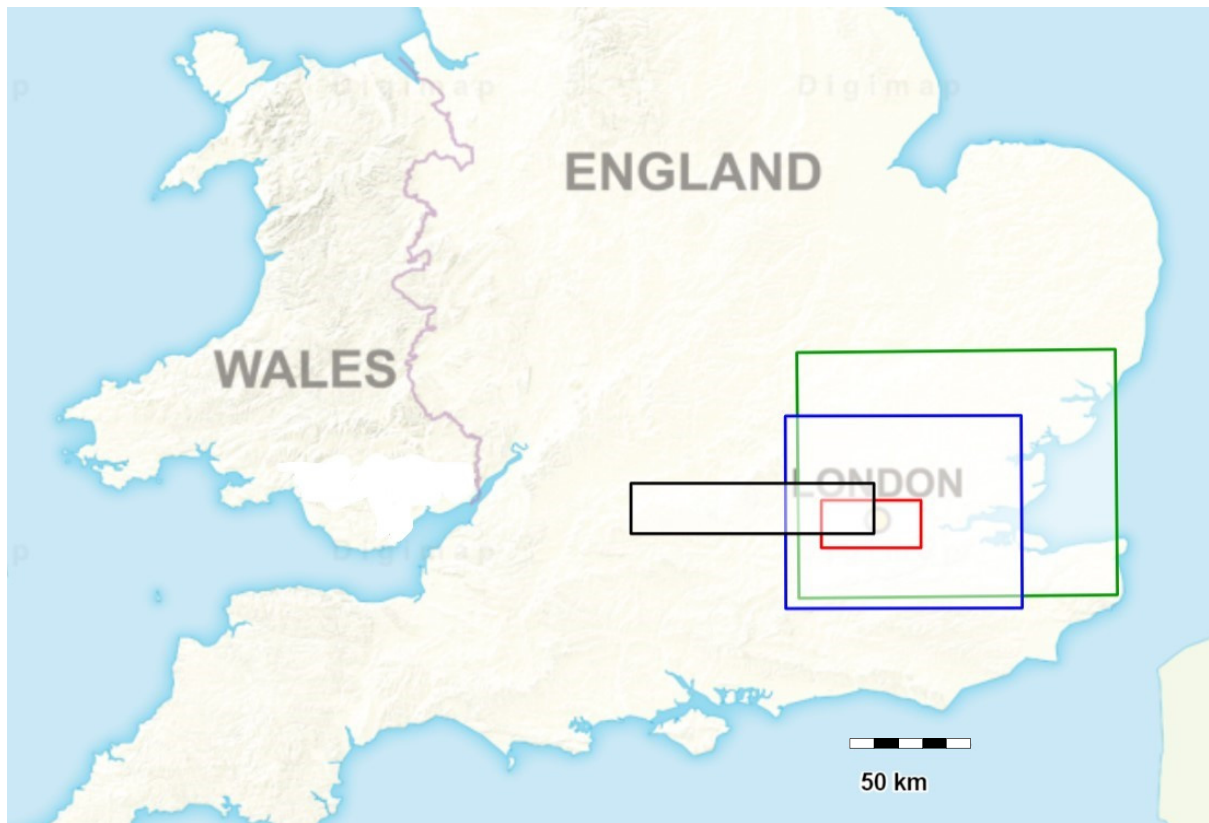

**Figure S1.** Relative positions of each of the maps shown in Figures 2, 3, 5 and 6 of the manuscript. Black rectangle indicates the approximate area depicted in Figure 2. Blue rectangle corresponds to the map shown in Figure 3. Red rectangle indicate the area depicted in Figure 5. Green rectangle matches the map shown in Figure 6.

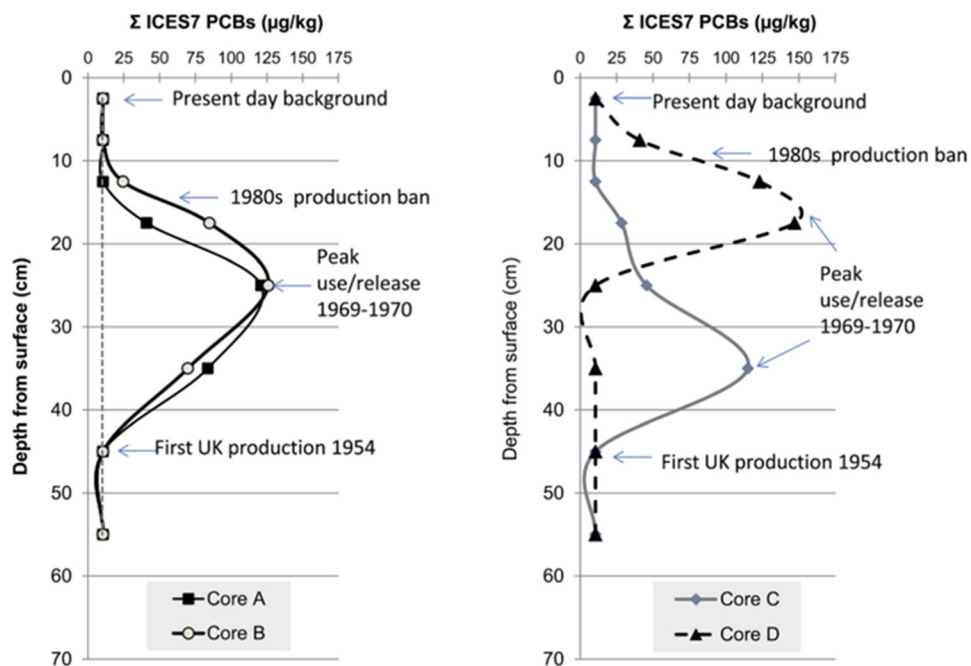

Vertical changes in polychlorinated biphenyls (PCB) concentration in four sediment cores from Chiswick Ait, River Thames.

**Figure S2.** Supplemental information on contaminants. Persistent Organic Pollutant (PCB) concentrations from four representative soil cores (A, B, C, D) taken from an island in the river Thames, England. Data from (Vane et al, 2020) - published by Royal Society of Chemistry - under a Creative Commons Attribution Generic License.

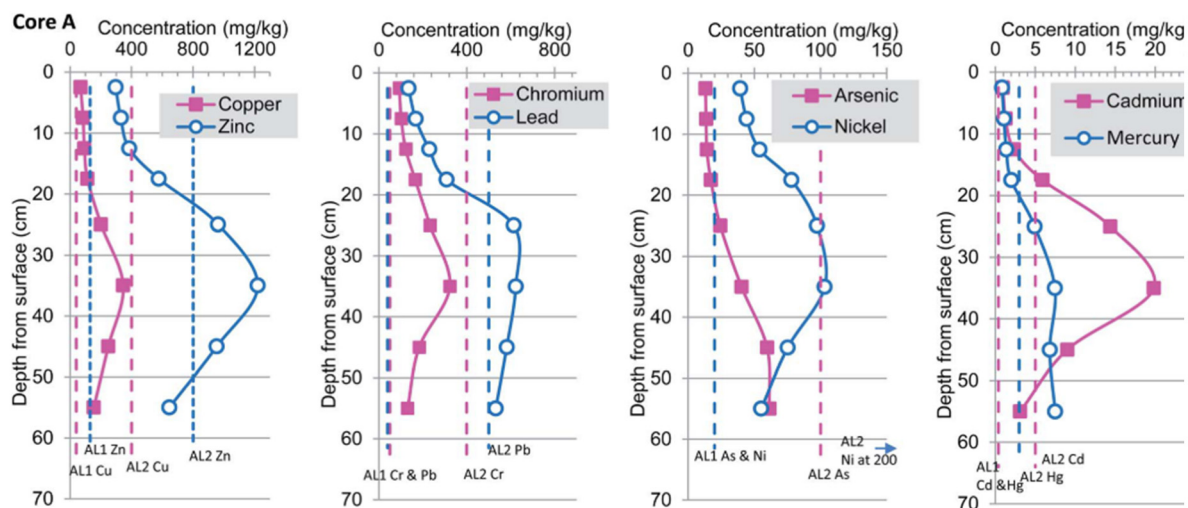

**Figure S3.** Supplemental information on contaminants. Contaminant profiles from a single core taken from an island in the river Thames, London, England (Vane et al, 2020) - published by Royal Society of Chemistry - under a Creative Commons Attribution Generic License.

Table S1. Supplemental information on contaminants

| Pollutant* | mg kg <sup>-1</sup>      |
|------------|--------------------------|
| Hg         | 4.6                      |
| Cu         | 155.6                    |
| Ni         | 62.7                     |
| Cd         | 9.2                      |
| Pb         | 402.0                    |
| As         | 32.0                     |
| Cr         | 181.2                    |
| PCB**      | 39.6 µg kg <sup>-1</sup> |

\*Mean pollutant concentrations (averaged from 4 representative cores) taken at Chiswick eyot (an island in the tidal Thames), from (Vane et al, 2020) - published by Royal Society of Chemistry - under a Creative Commons Attribution Generic License.. This is the first time that cores of soil have been taken in the tidal Thames to assess contamination.

\*\*Polychlorinated biphenyls, a class of Persistent Organic Pollutant (PCB)
